# Supplementary material for: Conformational equilibria in carboxylic acid bimolecules: a rotational study of acrylic acid–formic acid
Source: Royal Society of Chemistry journal article supplement (doi:10.1039/c2cp44131d), 2012-12-21
Supplement: c2cp44131d.pdf [file c2cp44131d.pdf]

# Conformational equilibria in carboxylic acid dimolecules: a rotational study of acrylic acid-formic acid

Gang Feng, Qian Gou, Luca Evangelisti, Zhining Xia, Walther Caminati\*

## Supplementary Information

### Content:

- 1) Completion of one Reference [24]
- 2) 5 Tables of observed transitions
- 3) 2 Tables with MP2 optimized geometries

### *Completion of the Reference:*

[24] GAUSSIAN03, Revision B.01, M. J. Frisch, G. W. Trucks, H. B. Schlegel, G. E. Scuseria, M. A. Robb, J. R. Cheeseman, J. A. Montgomery, Jr., T. Vreven, K. N. Kudin, J. C. Burant, J. M. Millam, S. S. Iyengar, J. Tomasi, V. Barone, B. Mennucci, M. Cossi, G. Scalmani, N. Rega, G. A. Petersson, H. Nakatsuji, M. Hada, M. Ehara, K. Toyota, R. Fukuda, J. Hasegawa, M. Ishida, T. Nakajima, Y. Honda, O. Kitao, H. Nakai, M. Klene, X. Li, J. E. Knox, H. P. Hratchian, J. B. Cross, C. Adamo, J. Jaramillo, R. Gomperts, R. E. Stratmann, O. Yazyev, A. J. Austin, R. Cammi, C. Pomelli, J. W. Ochterski, P. Y. Ayala, K. Morokuma, G. A. Voth, P. Salvador, J. J. Dannenberg, V. G. Zakrzewski, S. Dapprich, A. D. Daniels, M. C. Strain, O. Farkas, D. K. Malick, A. D. Rabuck, K. Raghavachari, J. B. Foresman, J. V. Ortiz, Q. Cui, A. G. Baboul, S. Clifford, J. Cioslowski, B. B. Stefanov, G. Liu, A. Liashenko, P. Piskorz, I. Komaromi, R. L. Martin, D. J. Fox, T. Keith, M. A. Al-Laham, C. Y. Peng, A. Nanayakkara, M. Challacombe, P. M. W. Gill, B. Johnson, W. Chen, M. W. Wong, C. Gonzalez, and J. A. Pople, Gaussian, Inc., Pittsburgh PA, **2003**.

Table S1. Observed transitions of several isotopomers of the *cis* conformer of AA...FA.

| Transitions       | normal           |                  | DCOOH            |                  | HCOOD            |                  | Acyclic-COOD     |                  | 2-D              |                  | Error |       |
|-------------------|------------------|------------------|------------------|------------------|------------------|------------------|------------------|------------------|------------------|------------------|-------|-------|
|                   | Observed<br>/MHz | $\delta$<br>/kHz |       |       |
| 5 <sub>05</sub>   | 4 <sub>04</sub>  | 8786.0409        | 0                | 8571.2809        | -2               | 8739.3062        | 2                | 8755.7755        | 3                | 8710.3266        | 2     | 0.005 |
| 5 <sub>15</sub>   | 4 <sub>14</sub>  | 8467.5169        | 0                | 8265.0285        | -2               | 8421.0640        | -4               | 8436.0935        | -2               | 8390.8857        | -7    | 0.005 |
| 5 <sub>14</sub>   | 4 <sub>13</sub>  | 9236.6011        | 0                | 8996.5796        | 4                | 9192.2071        | 4                | 9212.3915        | 2                | 9169.5238        | 4     | 0.005 |
| 5 <sub>24</sub>   | 4 <sub>23</sub>  | 8861.3001        | 1                | 8639.1151        | 0                |                  |                  |                  |                  |                  |       | 0.005 |
| 5 <sub>23</sub>   | 4 <sub>22</sub>  | 8946.0915        | 0                | 8715.5378        | 0                |                  |                  |                  |                  |                  |       | 0.005 |
| 5 <sub>33</sub>   | 4 <sub>32</sub>  | 8884.7869        | -1               |                  |                  |                  |                  |                  |                  |                  |       | 0.005 |
| 5 <sub>32</sub>   | 4 <sub>31</sub>  | 8886.3521        | -1               |                  |                  |                  |                  |                  |                  |                  |       | 0.005 |
| 6 <sub>06</sub>   | 5 <sub>05</sub>  | 10498.3971       | 0                | 10244.9499       | -3               | 10441.4838       | 2                | 10460.5100       | 2                | 10405.0779       | 1     | 0.005 |
| 6 <sub>16</sub>   | 5 <sub>15</sub>  | 10150.3222       | 0                | 9908.3515        | 0                | 10094.3827       | 0                | 10112.2407       | 0                | 10057.7840       | -1    | 0.005 |
| 6 <sub>15</sub>   | 5 <sub>14</sub>  | 11070.9274       | 0                | 10784.2538       | -1               | 11017.3702       | 0                | 11041.3512       | -1               | 10989.6007       | 2     | 0.005 |
| 7 <sub>07</sub>   | 6 <sub>06</sub>  | 12189.1018       | 0                | 11898.7802       | -3               | 12121.7015       | 3                | 12142.9863       | 1                | 12077.2506       | 3     | 0.005 |
| 7 <sub>17</sub>   | 6 <sub>16</sub>  | 11827.9256       | 0                | 11546.9335       | 3                | 11762.4145       | 5                | 11783.0231       | 3                | 11719.2207       | 0     | 0.005 |
| 7 <sub>16</sub>   | 6 <sub>15</sub>  | 12897.4692       | 0                | 12564.9860       | -7               | 12834.5652       | -8               | 12862.1916       | -8               | 12801.3603       | -5    | 0.005 |
| 8 <sub>08</sub>   | 7 <sub>07</sub>  | 13857.8437       | -1               | 13532.2044       | -3               | 13779.7433       | 2                | 13803.0572       | 3                | 10405.0779       | 1     | 0.005 |
| 8 <sub>18</sub>   | 7 <sub>17</sub>  | 13499.9518       | -1               | 13180.4127       | 9                |                  |                  |                  |                  |                  |       | 0.005 |
| 9 <sub>09</sub>   | 8 <sub>08</sub>  | 15506.1885       | -1               |                  |                  |                  |                  |                  |                  |                  |       | 0.005 |
| 9 <sub>19</sub>   | 8 <sub>18</sub>  | 15166.2183       | 1                |                  |                  |                  |                  |                  |                  |                  |       | 0.005 |
| 9 <sub>18</sub>   | 8 <sub>17</sub>  | 16519.4657       | -1               |                  |                  |                  |                  |                  |                  |                  |       | 0.005 |
| 6 <sub>25</sub>   | 5 <sub>24</sub>  | 10625.6812       | 0                | 10359.8486       | 2                |                  |                  |                  |                  |                  |       | 0.005 |
| 6 <sub>24</sub>   | 5 <sub>23</sub>  | 10772.2304       | 0                | 10492.0981       | 1                |                  |                  |                  |                  |                  |       | 0.005 |
| 6 <sub>34</sub>   | 5 <sub>33</sub>  | 10666.5005       | 0                |                  |                  |                  |                  |                  |                  |                  |       | 0.005 |
| 6 <sub>33</sub>   | 5 <sub>32</sub>  | 10670.6658       | 0                |                  |                  |                  |                  |                  |                  |                  |       | 0.005 |
| 7 <sub>26</sub>   | 6 <sub>25</sub>  | 12385.7870       | 0                | 12076.7285       | 4                |                  |                  |                  |                  |                  |       | 0.005 |
| 7 <sub>25</sub>   | 6 <sub>24</sub>  | 12615.6700       | -1               | 12284.5802       | -4               |                  |                  |                  |                  |                  |       | 0.005 |
| 7 <sub>35</sub>   | 6 <sub>34</sub>  | 12450.1732       | 0                |                  |                  |                  |                  |                  |                  |                  |       | 0.005 |
| 7 <sub>34</sub>   | 6 <sub>33</sub>  | 12459.5168       | 1                |                  |                  |                  |                  |                  |                  |                  |       | 0.005 |
| 9 <sub>28</sub>   | 8 <sub>27</sub>  | 15890.4488       | 1                |                  |                  |                  |                  |                  |                  |                  |       | 0.005 |
| 9 <sub>27</sub>   | 8 <sub>26</sub>  | 16350.7374       | 1                |                  |                  |                  |                  |                  |                  |                  |       | 0.005 |
| 10 <sub>010</sub> | 9 <sub>09</sub>  | 17137.3769       | 0                |                  |                  |                  |                  |                  |                  |                  |       | 0.005 |
| 10 <sub>110</sub> | 9 <sub>19</sub>  | 16826.7174       | 1                |                  |                  |                  |                  |                  |                  |                  |       | 0.005 |
| 4 <sub>04</sub>   | 3 <sub>03</sub>  | 7053.9904        | 0                | 6879.7263        | -1               |                  |                  |                  |                  |                  |       | 0.005 |
| 4 <sub>13</sub>   | 3 <sub>12</sub>  | 7396.1398        | 0                | 7203.4165        | 4                |                  |                  |                  |                  |                  |       | 0.005 |
| 4 <sub>23</sub>   | 3 <sub>22</sub>  | 7093.3408        | 1                |                  |                  |                  |                  |                  |                  |                  |       | 0.005 |
| 4 <sub>22</sub>   | 3 <sub>21</sub>  | 7136.0361        | 1                |                  |                  |                  |                  |                  |                  |                  |       | 0.005 |
| 4 <sub>32</sub>   | 3 <sub>31</sub>  | 7105.0234        | 1                |                  |                  |                  |                  |                  |                  |                  |       | 0.005 |
| 4 <sub>31</sub>   | 3 <sub>30</sub>  | 7105.4707        | 1                |                  |                  |                  |                  |                  |                  |                  |       | 0.005 |
| 2 <sub>12</sub>   | 1 <sub>01</sub>  | 7469.6731        | 1                | 7411.1576        | 6                |                  |                  |                  |                  |                  |       | 0.005 |
| 3 <sub>13</sub>   | 2 <sub>02</sub>  | 9014.2881        | 0                | 8922.3129        | 5                | 8925.3867        | 11               | 8918.0438        | 14               | 8830.4078        | 2     | 0.005 |
| 4 <sub>14</sub>   | 3 <sub>03</sub>  | 10488.9644       | -1               |                  |                  | 10390.3821       | 3                | 10384.6967       | -6               |                  |       | 0.005 |
| 5 <sub>15</sub>   | 4 <sub>04</sub>  | 11902.4916       | 0                | 11751.8810       | 7                | 11794.3523       | 8                | 11790.0948       | -8               | 11683.6240       | 2     | 0.005 |
| 2 <sub>21</sub>   | 1 <sub>10</sub>  | 15928.8103       | 0                | 15901.5627       | 4                |                  |                  |                  |                  |                  |       | 0.005 |
| 2 <sub>20</sub>   | 1 <sub>11</sub>  | 16087.2338       | 0                |                  |                  |                  |                  |                  |                  |                  |       | 0.005 |
| 3 <sub>22</sub>   | 2 <sub>11</sub>  | 17548.8428       | 1                | 17484.5165       | 2                |                  |                  |                  |                  |                  |       | 0.005 |
| 3 <sub>21</sub>   | 2 <sub>12</sub>  | 18032.6646       | -2               |                  |                  |                  |                  |                  |                  |                  |       | 0.005 |
| 3 <sub>22</sub>   | 3 <sub>13</sub>  | 12922.5620       | 0                |                  |                  |                  |                  |                  |                  |                  |       | 0.005 |
| 3 <sub>21</sub>   | 3 <sub>12</sub>  | 12019.2693       | 1                | 12097.7465       | 4                |                  |                  |                  |                  |                  |       | 0.005 |



Table S3. Observed transitions of the  $^{13}\text{C}$  species of *cis*-AA...FA.

| transitions     | C10             |            | C1       |            | C2       |            | C3       |            | Error |       |
|-----------------|-----------------|------------|----------|------------|----------|------------|----------|------------|-------|-------|
|                 | Observed        | $\delta$   | Observed | $\delta$   | Observed | $\delta$   | Observed | $\delta$   |       |       |
|                 | /MHz            | /kHz       | /MHz     | /kHz       | /MHz     | /kHz       | /MHz     | /kHz       |       |       |
| 5 <sub>05</sub> | 4 <sub>04</sub> | 8674.7922  | -1       | 8769.3947  | -1       | 8690.1282  | -3       | 8619.0926  | -2    | 0.005 |
| 5 <sub>15</sub> | 4 <sub>14</sub> | 8362.6289  | -4       | 8451.7385  | -5       | 8376.8424  | -6       | 8309.2958  | -4    | 0.005 |
| 5 <sub>14</sub> | 4 <sub>13</sub> | 9112.0802  | 2        | 9218.2236  | 5        | 9130.0203  | 2        | 9052.4207  | 2     | 0.005 |
| 6 <sub>06</sub> | 5 <sub>05</sub> | 10367.1612 | -1       | 10478.7036 | -2       | 10385.0829 | -2       | 10300.8523 | -3    | 0.005 |
| 6 <sub>16</sub> | 5 <sub>15</sub> | 10024.9960 | 0        | 10131.4580 | 1        | 10041.9401 | 1        | 9961.1202  | -2    | 0.005 |
| 6 <sub>15</sub> | 5 <sub>14</sub> | 10922.2240 | -1       | 11048.9621 | 0        | 10943.5971 | 0        | 10850.7971 | 1     | 0.005 |
| 7 <sub>07</sub> | 6 <sub>06</sub> | 12038.8354 | 2        | 12166.4838 | 2        | 12059.1412 | 2        | 11962.1537 | 0     | 0.005 |
| 7 <sub>17</sub> | 6 <sub>16</sub> | 11682.4053 | 7        | 11806.0003 | 3        | 11702.0229 | 5        | 11608.0516 | 8     | 0.005 |
| 7 <sub>16</sub> | 6 <sub>15</sub> | 12725.0321 | -5       | 12871.9734 | -6       | 12749.7426 | -4       | 12641.9362 | -2    | 0.005 |
| 4 <sub>04</sub> | 3 <sub>03</sub> | 6963.6861  | -1       | 7040.5091  | -2       | 6976.2358  | -1       | 6918.8236  | -3    | 0.005 |
| 4 <sub>13</sub> | 3 <sub>12</sub> | 7296.1489  | 4        | 7381.3903  | 6        | 7310.5827  | 6        | 7248.3336  | 2     | 0.005 |
| 2 <sub>12</sub> | 1 <sub>01</sub> | 7440.3371  | 7        | 7462.9729  | 4        | 7437.4586  | 3        |            |       | 0.005 |
| 3 <sub>13</sub> | 2 <sub>02</sub> | 8967.6487  | 0        | 9004.9190  | -4       | 8966.9233  | -3       | 8920.6760  | 3     | 0.005 |
| 4 <sub>14</sub> | 3 <sub>03</sub> | 10426.6144 | -7       |            |          |            |          | 10370.7310 | -3    | 0.005 |

Table S4. Observed transitions of the  $^{13}\text{C}$  species of *trans*-AA...FA.

| transitions     | C10             |            | C1       |            | C2       |            | C3       |            | Error |       |
|-----------------|-----------------|------------|----------|------------|----------|------------|----------|------------|-------|-------|
|                 | Observed        | $\delta$   | Observed | $\delta$   | Observed | $\delta$   | Observed | $\delta$   |       |       |
|                 | /MHz            | /kHz       | /MHz     | /kHz       | /MHz     | /kHz       | /MHz     | /kHz       |       |       |
| 5 <sub>05</sub> | 4 <sub>04</sub> | 8587.7387  | -1       | 8681.1692  | -1       | 8604.2575  | -3       | 8528.5410  | -2    | 0.005 |
| 5 <sub>15</sub> | 4 <sub>14</sub> | 8293.1259  | -6       | 8381.1972  | -4       | 8308.2963  | -4       | 8236.9730  | -6    | 0.005 |
| 5 <sub>14</sub> | 4 <sub>13</sub> | 8979.5952  | 3        | 9082.9514  | 3        | 8998.9131  | 3        | 8915.0823  | 4     | 0.005 |
| 6 <sub>06</sub> | 5 <sub>05</sub> | 10271.8641 | -1       | 10382.4549 | -2       | 10291.2097 | 0        | 10201.5871 | -4    | 0.005 |
| 6 <sub>16</sub> | 5 <sub>15</sub> | 9943.7632  | -2       | 10049.0863 | -1       | 9961.8542  | 0        | 9876.5618  | -2    | 0.005 |
| 6 <sub>15</sub> | 5 <sub>14</sub> | 10766.1422 | 3        | 10889.7027 | -1       | 10789.1745 | 1        | 10688.9477 | -2    | 0.005 |
| 7 <sub>07</sub> | 6 <sub>06</sub> | 11939.2136 | 0        | 12066.2717 | 1        | 11961.1647 | 1        | 11858.2160 | 2     | 0.005 |
| 7 <sub>17</sub> | 6 <sub>16</sub> | 11590.4337 | 6        | 11712.8369 | 5        | 11611.3848 | 3        | 11512.2672 | 7     | 0.005 |
| 7 <sub>16</sub> | 6 <sub>15</sub> | 12547.1500 | -4       |            |          | 12573.8115 | -3       |            |       | 0.005 |

Table S5. Observed transitions of  $^{13}\text{C}$ /deuterated species of *cis* AA...FA.

**D6&D13**

| transitions     | C10             |            | C1       |            | C2       |            | C3       |            | Error |       |
|-----------------|-----------------|------------|----------|------------|----------|------------|----------|------------|-------|-------|
|                 | Observed        | $\delta$   | Observed | $\delta$   | Observed | $\delta$   | Observed | $\delta$   |       |       |
|                 | /MHz            | /kHz       | /MHz     | /kHz       | /MHz     | /kHz       | /MHz     | /kHz       |       |       |
| 5 <sub>05</sub> | 4 <sub>04</sub> | 8601.7703  | 1        | 8693.4344  | 2        | 8614.8114  | 2        | 8544.7913  | 1     | 0.005 |
| 5 <sub>15</sub> | 4 <sub>14</sub> | 8288.5245  | -5       | 8374.8818  | -2       | 8300.5962  | -5       | 8234.0042  | -2    | 0.005 |
| 5 <sub>14</sub> | 4 <sub>13</sub> | 9047.5527  | 1        | 9150.7857  | 1        | 9062.9558  | 3        | 8986.3263  | 5     | 0.005 |
| 6 <sub>06</sub> | 5 <sub>05</sub> | 10277.1609 | -1       | 10385.1124 | -4       | 10292.3562 | 0        | 10209.3794 | 0     | 0.005 |
| 6 <sub>16</sub> | 5 <sub>15</sub> | 9935.5156  | 6        | 10038.6482 | 2        | 9949.8859  | -1       | 9870.2210  | -2    | 0.005 |
| 6 <sub>15</sub> | 5 <sub>14</sub> | 10843.9970 | -1       | 10967.2174 | 1        | 10862.3321 | 1        | 10770.7037 | -4    | 0.005 |
| 7 <sub>07</sub> | 6 <sub>06</sub> | 11930.9381 | 0        | 12054.3487 | 2        | 11948.1016 | -1       | 11852.6129 | 0     | 0.005 |
| 7 <sub>17</sub> | 6 <sub>16</sub> | 11577.2831 | -2       |            |          | 11593.9228 | 4        | 11501.3041 | 3     | 0.005 |
| 7 <sub>16</sub> | 6 <sub>15</sub> |            | -4       | 12775.3950 | -2       | 12653.7744 | -4       |            |       | 0.005 |

**D13**

| transitions     | C10             |            | C1       |            | C2       |            | C3       |            | Error |       |
|-----------------|-----------------|------------|----------|------------|----------|------------|----------|------------|-------|-------|
|                 | Observed        | $\delta$   | Observed | $\delta$   | Observed | $\delta$   | Observed | $\delta$   |       |       |
|                 | /MHz            | /kHz       | /MHz     | /kHz       | /MHz     | /kHz       | /MHz     | /kHz       |       |       |
| 5 <sub>05</sub> | 4 <sub>04</sub> | 8629.7858  | 0        | 8722.4414  | 2        | 8643.4693  | 1        | 8573.2734  | -3    | 0.005 |
| 5 <sub>15</sub> | 4 <sub>14</sub> | 8317.8119  | 2        | 8405.0735  | -4       | 8330.4614  | -6       | 8263.7160  | -4    | 0.005 |
| 5 <sub>14</sub> | 4 <sub>13</sub> | 9069.4351  | 1        | 9173.5710  | 4        | 9085.5617  | 8        | 9008.8083  | 8     | 0.005 |
| 6 <sub>06</sub> | 5 <sub>05</sub> | 10312.3492 | 0        |            |          | 10328.2982 | -4       | 10245.0942 | -1    | 0.005 |
| 6 <sub>16</sub> | 5 <sub>15</sub> |            |          | 10075.2658 | 1        | 9986.0948  | -1       | 9906.2408  | 0     | 0.005 |
| 6 <sub>15</sub> | 5 <sub>14</sub> | 10870.7780 | -7       | 10995.0962 | -4       | 10889.9726 | 0        | 10798.1903 | 0     | 0.005 |
| 7 <sub>07</sub> | 6 <sub>06</sub> | 11973.9087 | 0        | 12098.7959 | -1       | 11991.9401 | 3        | 11896.1579 | 2     | 0.005 |
| 7 <sub>17</sub> | 6 <sub>16</sub> | 11619.1953 | -2       | 11740.1971 | 2        | 11636.6362 | 5        | 11543.7848 | 3     | 0.005 |
| 7 <sub>16</sub> | 6 <sub>15</sub> | 12664.6362 | 5        |            |          | 12686.7836 | -6       | 12580.1736 | -5    | 0.005 |

**D6**

| transitions     | C10             |            | C1       |          | C2       |            | C3       |            | Error |       |
|-----------------|-----------------|------------|----------|----------|----------|------------|----------|------------|-------|-------|
|                 | Observed        | $\delta$   | Observed | $\delta$ | Observed | $\delta$   | Observed | $\delta$   |       |       |
|                 | /MHz            | /kHz       | /MHz     | /kHz     | /MHz     | /kHz       | /MHz     | /kHz       |       |       |
| 5 <sub>05</sub> | 4 <sub>04</sub> | 8645.5217  | -2       |          |          | 8660.1749  | -3       | 8589.3390  | 0     | 0.005 |
| 5 <sub>15</sub> | 4 <sub>14</sub> | 8332.1308  | -3       |          |          | 8345.7303  | -2       | 8278.3532  | -4    | 0.005 |
| 5 <sub>14</sub> | 4 <sub>13</sub> | 9088.7329  | 6        |          |          | 9105.8956  | 5        | 9028.4377  | 8     | 0.005 |
| 6 <sub>06</sub> | 5 <sub>05</sub> | 10330.5310 | 1        |          |          | 10347.6496 | 4        | 10263.6691 | -3    | 0.005 |
| 6 <sub>16</sub> | 5 <sub>15</sub> | 9988.0363  | -3       |          |          | 10004.2465 | 0        | 9923.6418  | 4     | 0.005 |
| 6 <sub>15</sub> | 5 <sub>14</sub> | 10893.7019 | -1       |          |          | 10914.1447 | -4       | 10821.5123 | -6    | 0.005 |
| 7 <sub>07</sub> | 6 <sub>06</sub> | 11994.2438 | 0        |          |          | 12013.6271 | -1       | 11916.9622 | 2     | 0.005 |
| 7 <sub>17</sub> | 6 <sub>16</sub> | 11638.8310 | 5        |          |          | 11657.5972 | 2        | 11563.8624 | 0     | 0.005 |
| 7 <sub>16</sub> | 6 <sub>15</sub> | 12691.0247 | -3       |          |          |            |          |            |       | 0.005 |

**Table S6.** MP2/6-311++G(d, p) geometry of *cis*-AA...FA.

| bond lengths/Å |        | angles/°  |       | dihedral angle/° |       |
|----------------|--------|-----------|-------|------------------|-------|
| C2C1           | 1.4837 |           |       |                  |       |
| C3C2           | 1.3412 | C3C2C1    | 120.8 |                  |       |
| O4C1           | 1.2287 | O4C1C2    | 123.5 | O4C1C2C3         | 0.0   |
| O5C1           | 1.3275 | O5C1C2    | 112.2 | O5C1C2C3         | 180.0 |
| H6O5           | 0.9891 | H6O5C1    | 108.9 | H6O5C1C2         | 180.0 |
| H7C2           | 1.0848 | H7C2C1    | 116.8 | H7C2C1O4         | 180.0 |
| H8C3           | 1.0845 | H8C3C2    | 121.1 | H8C3C2C1         | 180.0 |
| H8C3           | 1.0855 | H8C3C2    | 120.3 | H8C3C2C1         | 0.0   |
| C10C1          | 3.8496 | C10C1C3   | 152.1 | C10C1C3C2        | 180.0 |
| O11C10         | 1.2218 | O11C10C1  | 58.5  | O11C10C1C3       | 180.0 |
| O12C10         | 1.3176 | O12C10O11 | 126.2 | O12C10O11C1      | 0.0   |
| H13O12         | 0.9934 | H13O12C10 | 108.6 | H13O12C10O11     | 0.0   |
| H14C10         | 1.0956 | H14C10O11 | 122.3 | H14C10O11O12     | 180.0 |

**Table S7.** MP2/6-311++G(d, p) geometry of *trans*-AA...FA

| bond lengths/Å |        | angles/°  |       | dihedral angle/° |       |
|----------------|--------|-----------|-------|------------------|-------|
| C2C1           | 1.4807 |           |       |                  |       |
| C3C2           | 1.3420 | C3C2C1    | 123.2 |                  |       |
| O4C1           | 1.2304 | O4C1C2    | 121.2 | O4C1C2C3         | 180.0 |
| O5C1           | 1.3268 | O5C1C2    | 114.6 | O5C1C2C3         | 0.0   |
| H6O5           | 0.9886 | H6O5C1    | 108.7 | H6O5C1C2         | 180.0 |
| H7C2           | 1.0849 | H7C2C1    | 114.6 | H7C2C1O5         | 180.0 |
| H8C3           | 1.0850 | H8C3C2    | 120.7 | H8C3C2C1         | 180.0 |
| H8C3           | 1.0846 | H8C3C2    | 121.0 | H8C3C2C1         | 0.0   |
| C10C1          | 3.8498 | C10C1C3   | 155.4 | C10C1C3C2        | 180.0 |
| O11C10         | 1.2219 | O11C10C1  | 58.4  | O11C10C1C3       | 0.0   |
| O12C10         | 1.3174 | O12C10O11 | 126.3 | O12C10O11C1      | 0.0   |
| H13O12         | 0.9934 | H13O12C10 | 108.6 | H13O12C10O11     | 0.0   |
| H14C10         | 1.0955 | H14C10O11 | 122.3 | H14C10O11O12     | 180.0 |
